# Supplementary material for: Roles of cysteine in the structure and metabolic function of Mycobacterium tuberculosis CYP142A1
Source: Royal Society of Chemistry journal article supplement (doi:10.1039/d2ra04257f), 2022-01-01
Supplement: d2ra04257f1.pdf [file d2ra04257f1.pdf]

## Roles of Cysteine in the Structure and Metabolic Function of *Mycobacterium tuberculosis* CYP142A1

Yun Lu<sup>a</sup>, Lilan Sun<sup>a</sup>, Jing Pang<sup>a</sup>, Congran Li<sup>a</sup>, Xiukun Wang<sup>a</sup>, Xinxin Hu<sup>a</sup>, Guoqing Li<sup>a</sup>, Xue Li<sup>a</sup>, Youwen Zhang<sup>a</sup>, Hao Wang<sup>b</sup>, Xinyi Yang<sup>\*a</sup> and Xuefu You<sup>\*a</sup>

<sup>a</sup>Beijing Key Laboratory of Antimicrobial Agents, Institute of Medicinal Biotechnology, Chinese Academy of Medical Sciences and Peking Union Medical College, Beijing, China

<sup>b</sup>School of Pharmacy, Minzu University of China, Beijing, China

Fig. S1~7

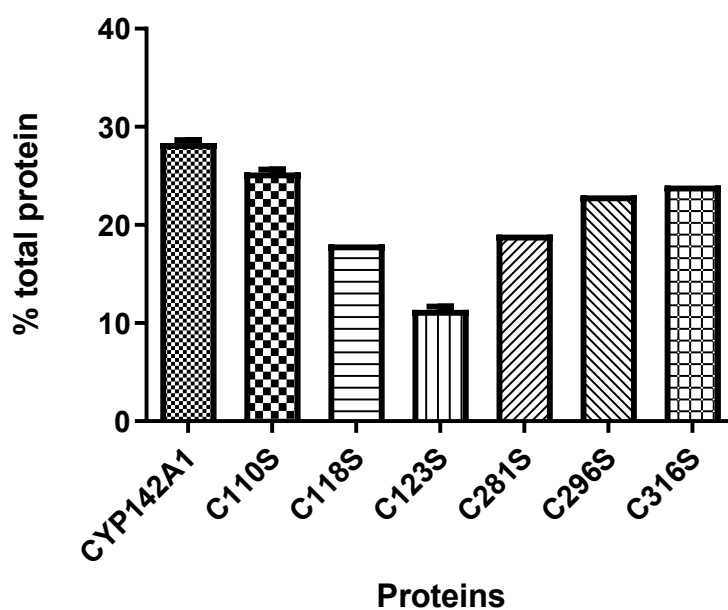

**Fig. S1.** Effects of single-cysteine mutations on the expression of CYP142A1 in *E. coli*. All values were normalized and shown as a percentage of the expression level of total protein.

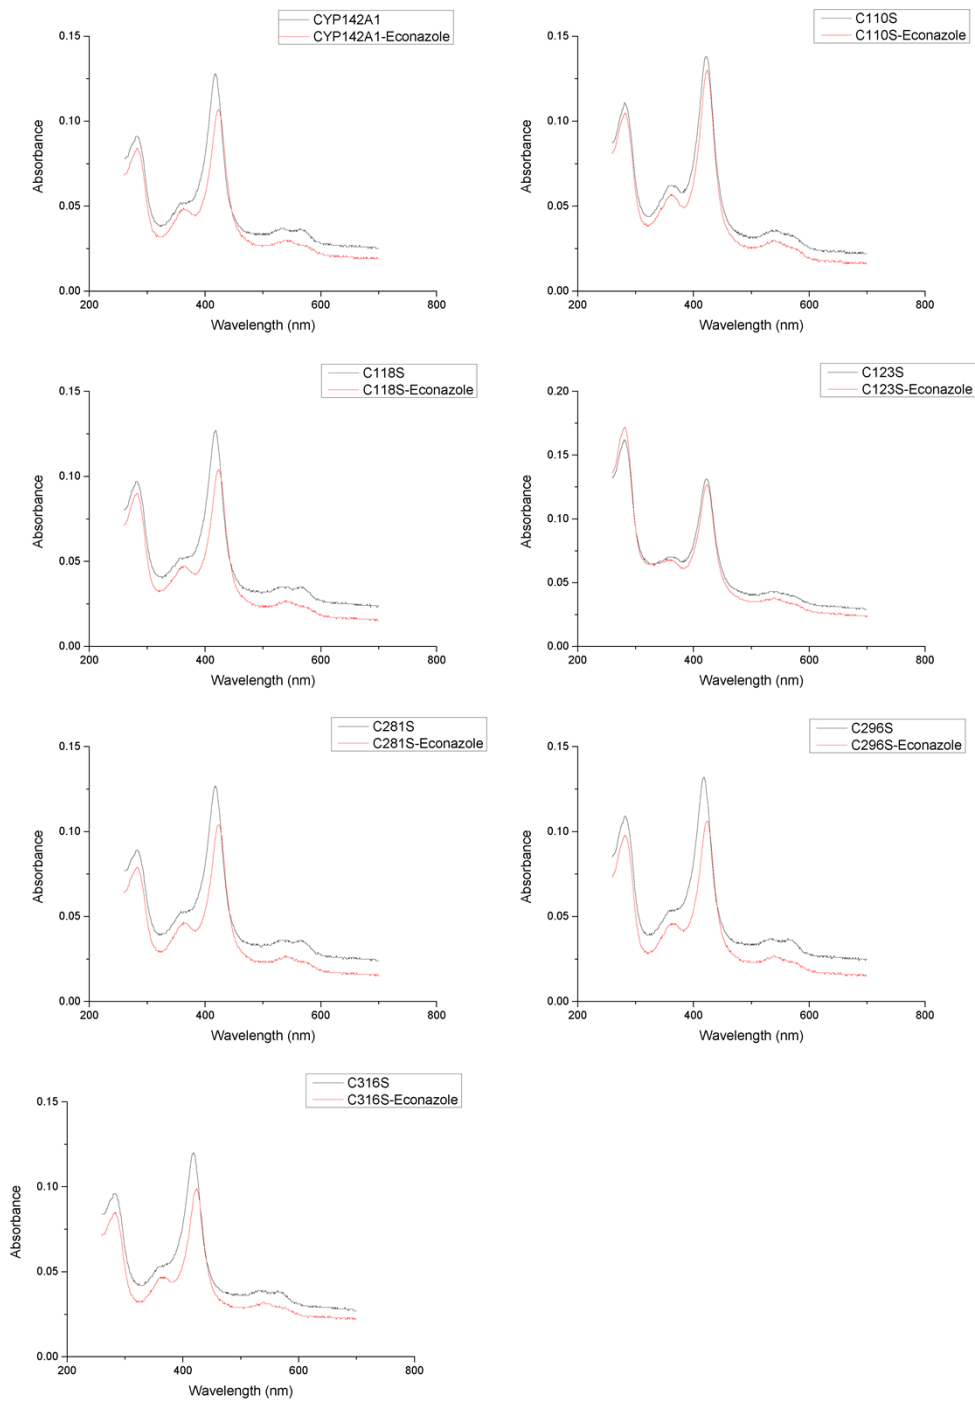

**Fig. S2.** UV-visible absorption features of substrate-free recombinant CYP142A1 and cysteine-to-serine mutants and of enzymes bound to econazole nitrate (100 nM).

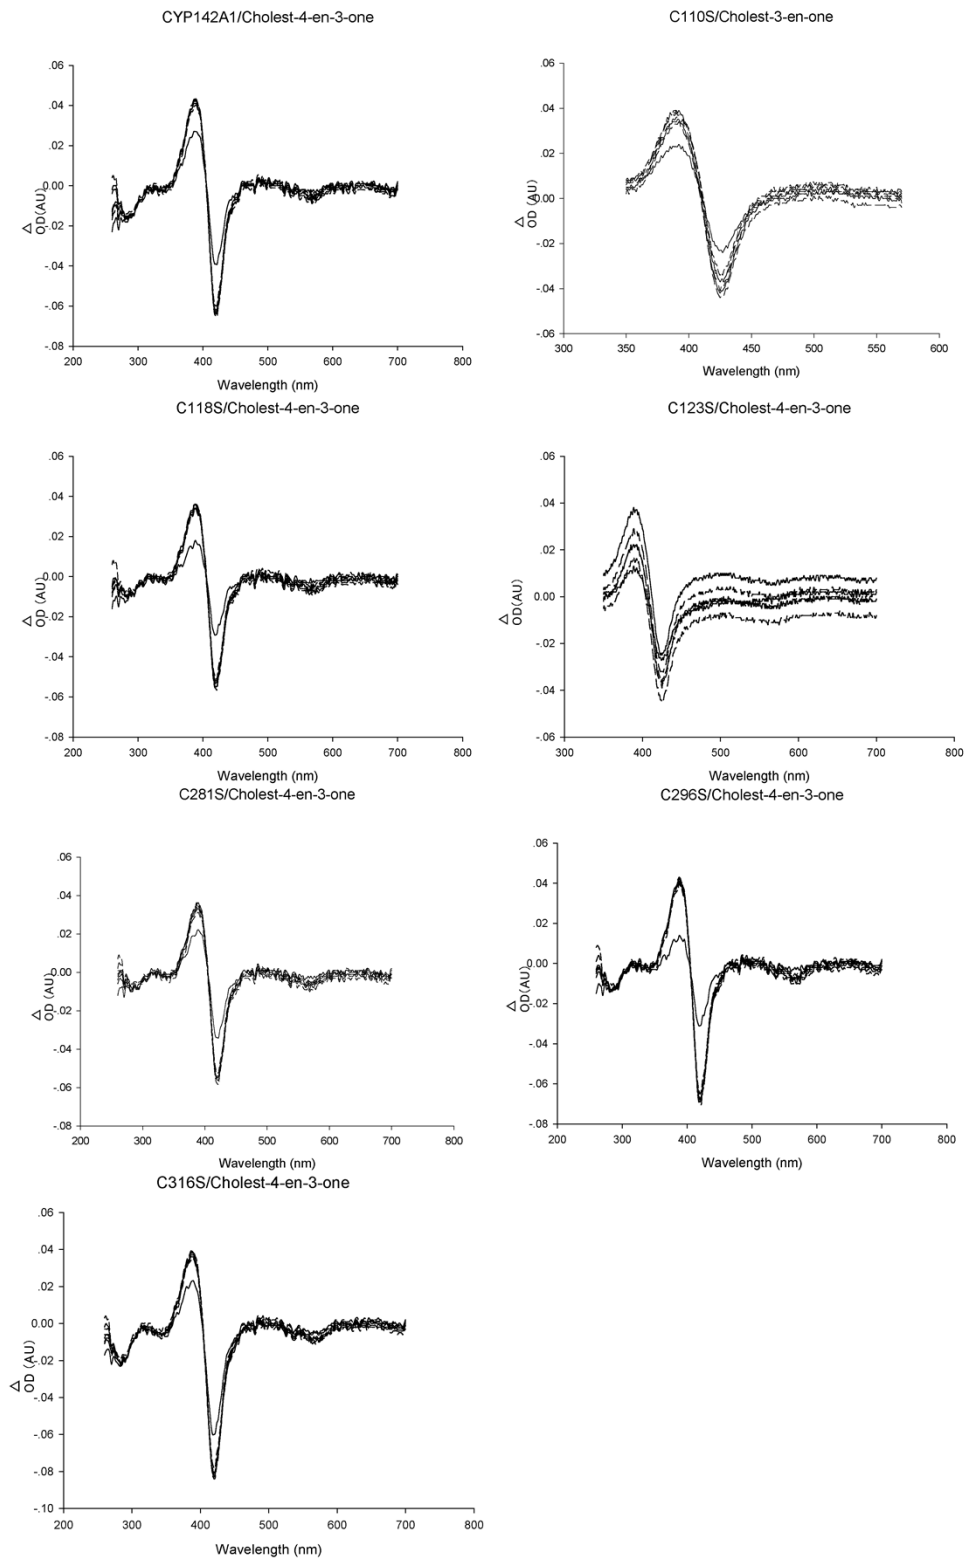

**Fig. S3.** Titration spectra of recombinant wild-type CYP142A1 and non-central cysteine mutants against cholest-4-en-3-one.

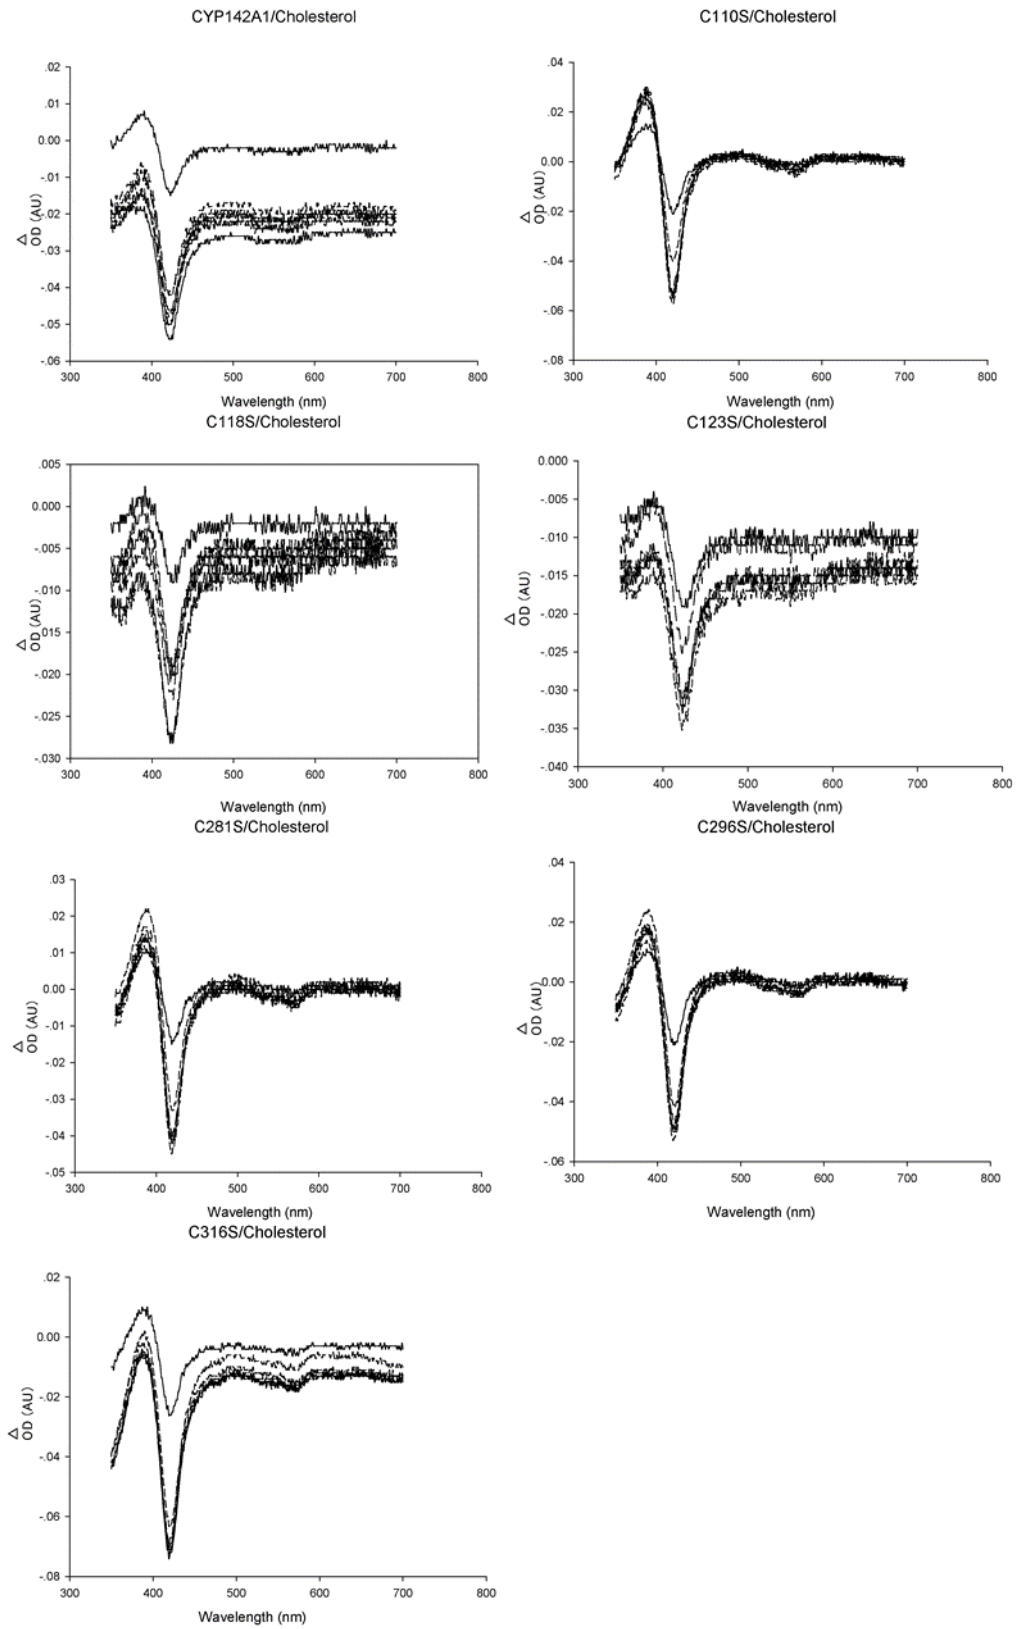

**Fig. S4.** Titration spectra of recombinant wild-type CYP142A1 and non-central cysteine mutants against cholesterol.

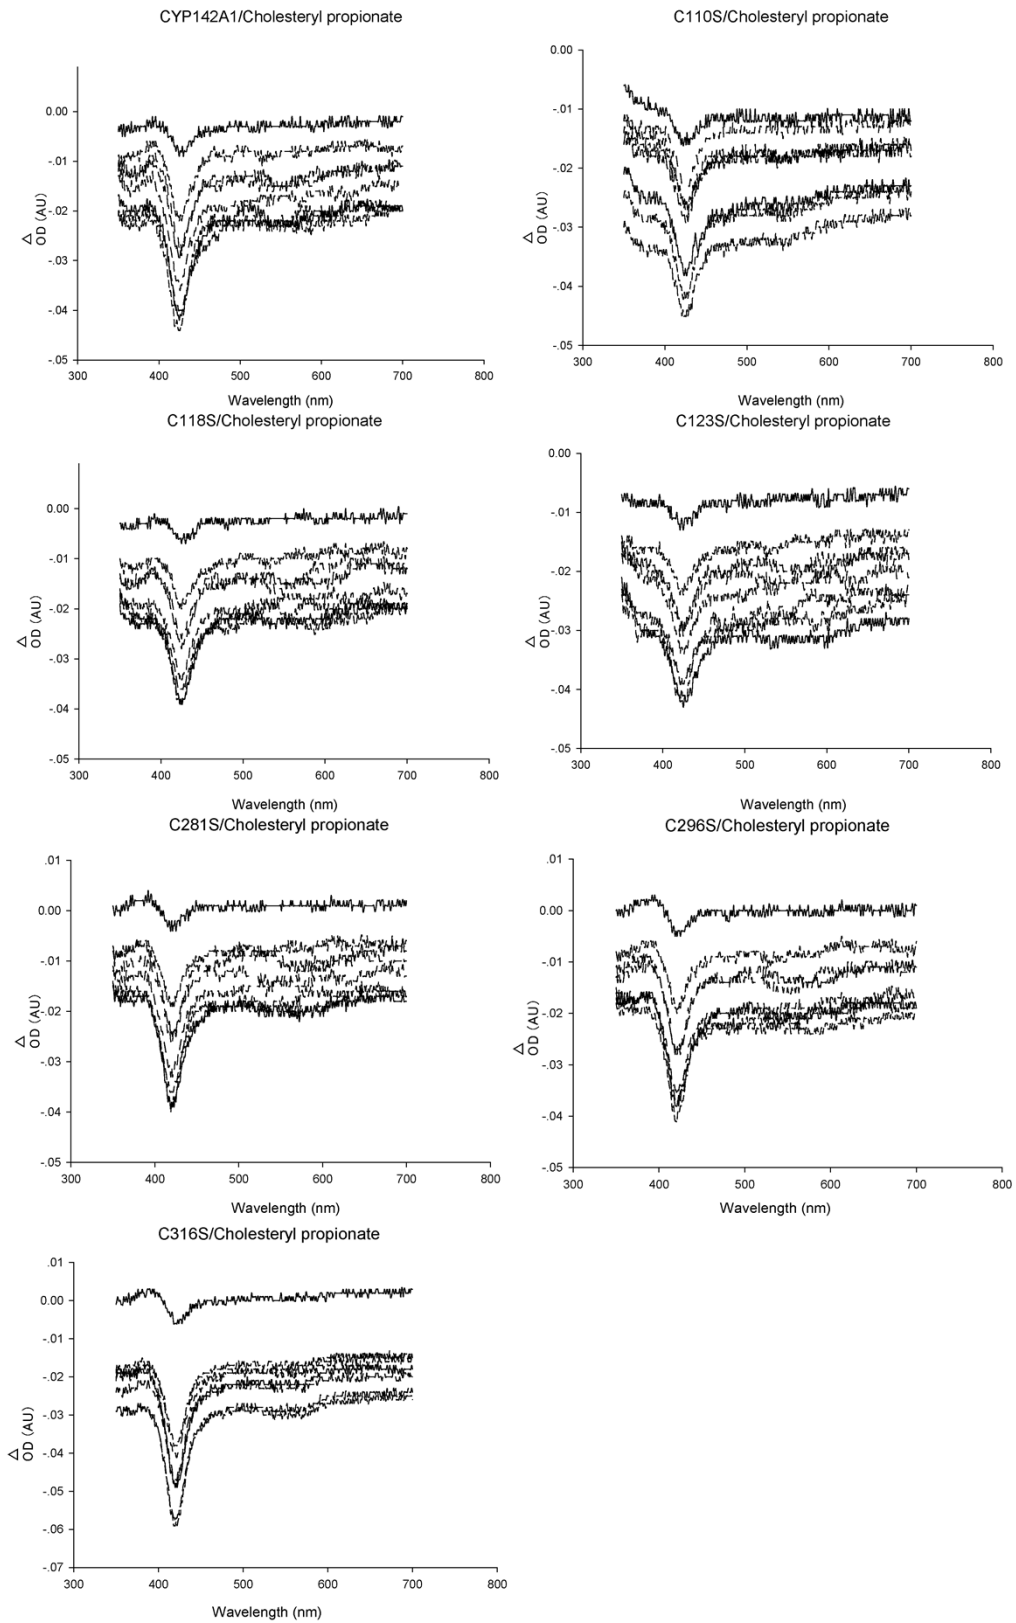

**Fig. S5.** Titration spectra of recombinant wild-type CYP142A1 and non-central cysteine mutants against cholesteryl propionate.

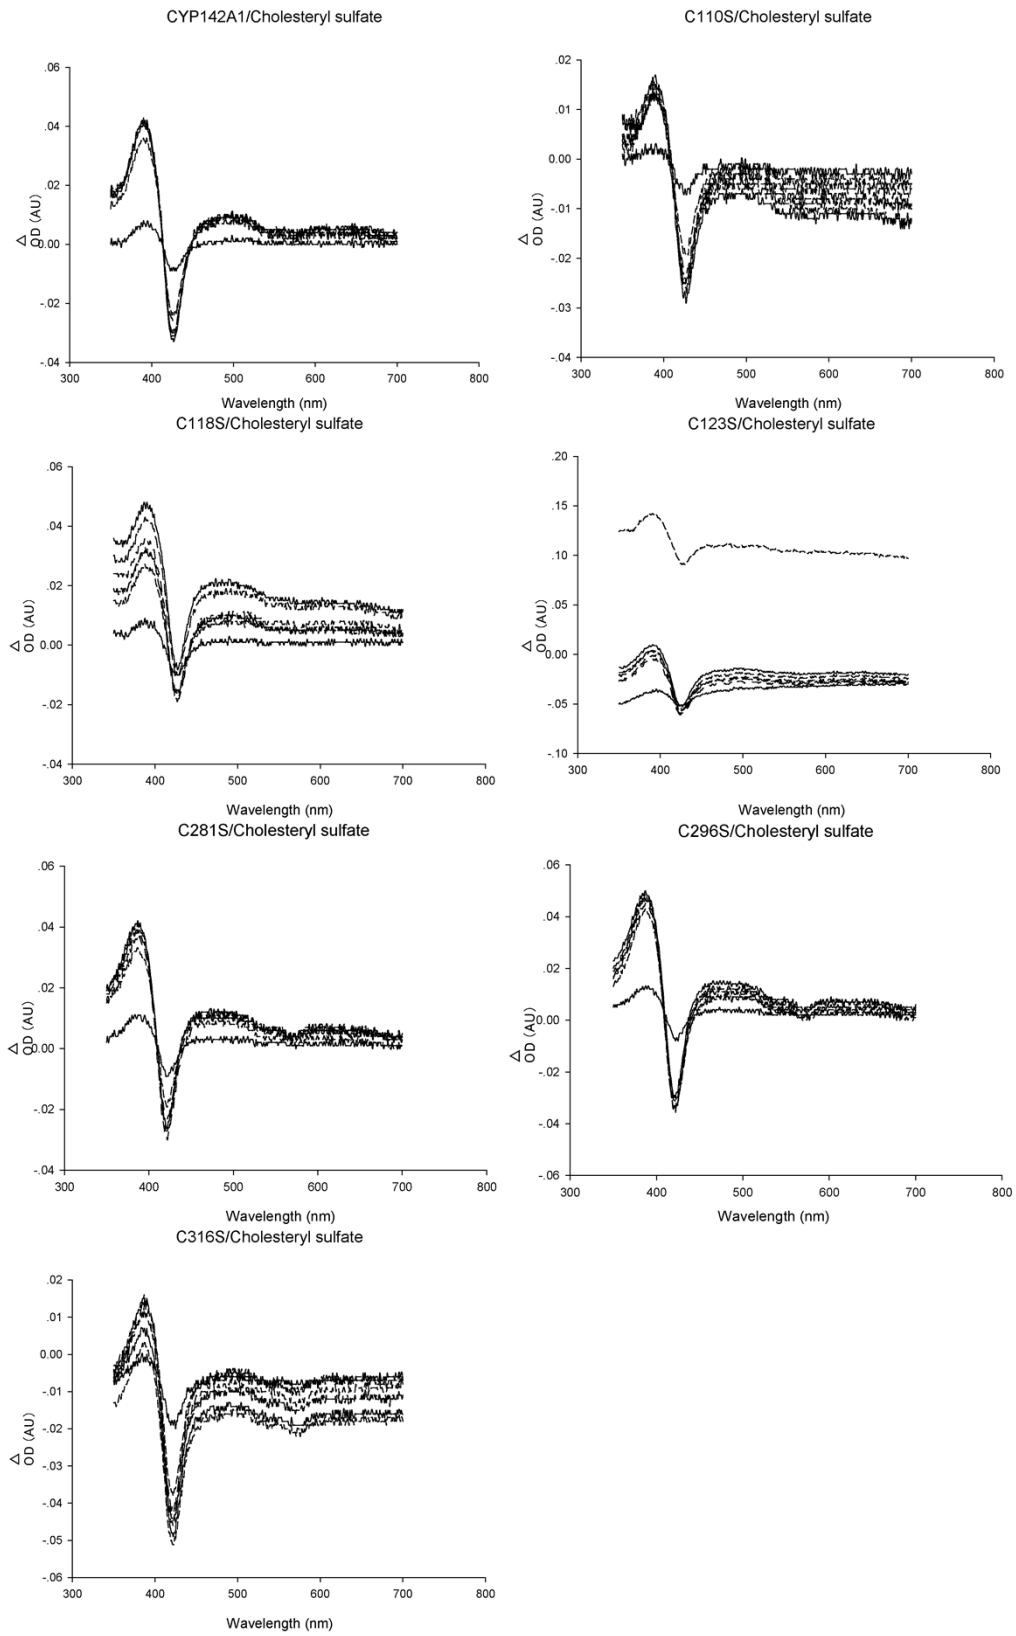

**Fig. S6.** Titration spectra of recombinant wild-type CYP142A1 and non-central cysteine mutants against cholesteryl sulfate.

CYP142A1/Econazole

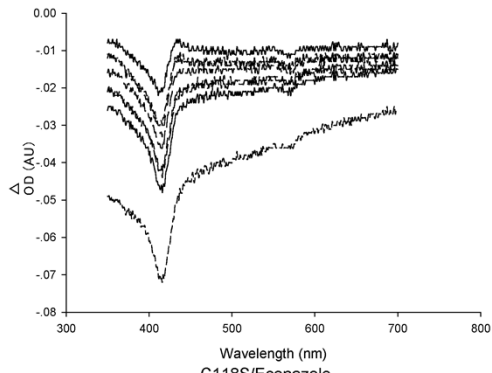

C110S/Econazole

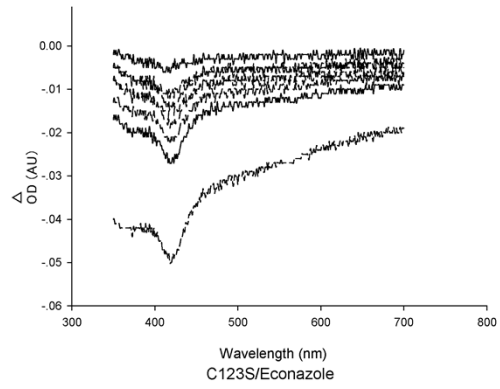

C118S/Econazole

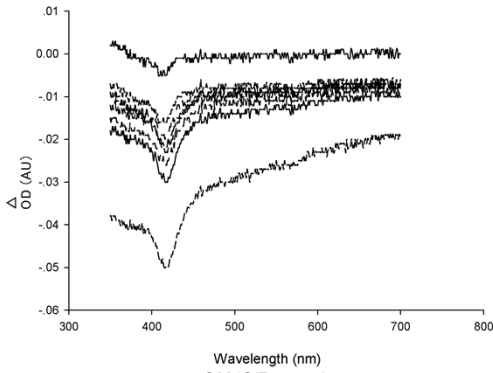

C123S/Econazole

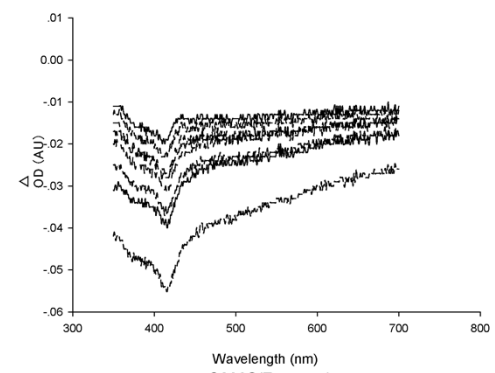

C281S/Econazole

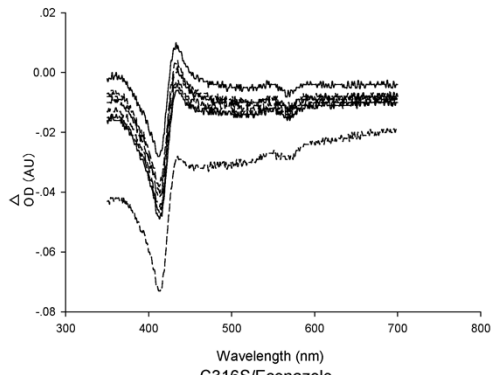

C296S/Econazole

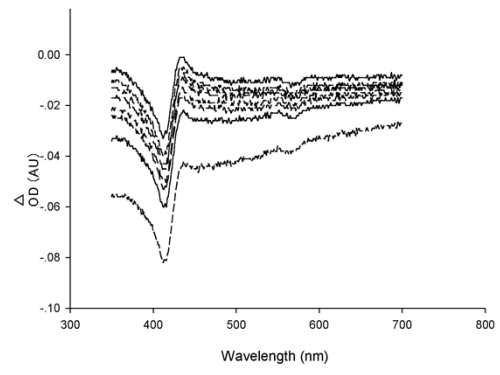

C316S/Econazole

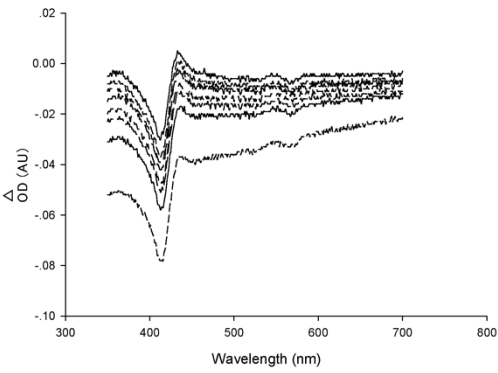

**Fig. S7.** Titration spectra of recombinant wild-type CYP142A1 and the non-central cysteine mutants against econazole nitrate.

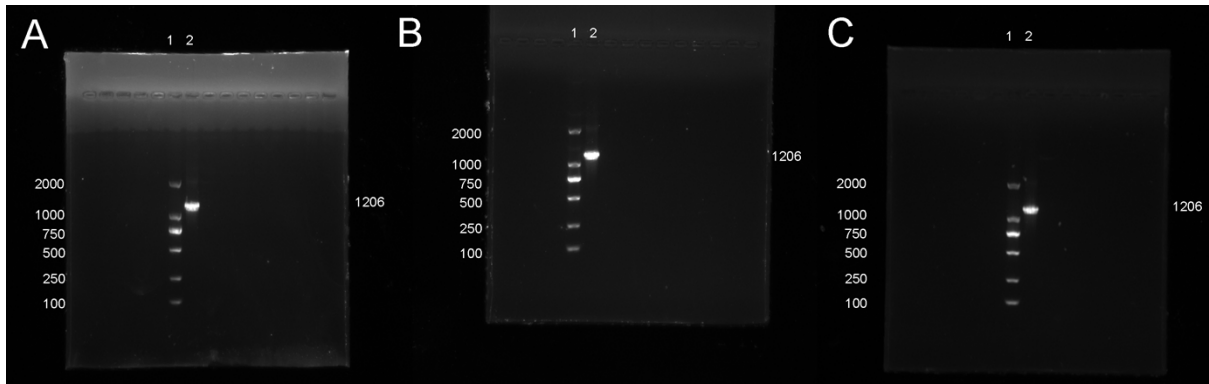

**Fig. S8.** Whole gel electrophoresis of *cyp142* gene cloned by PCR for three replicates. Lane 1, DL2000 marker (100, 250, 500, 750, 1,000, and 2,000 bp); Lane 2 *cyp142*(1206bp). A, PCR for the first time; B, PCR for the second time; C, PCR for the third time.

**Table S1~2**

**Table S1.** Primers used in *cyp142* clone and site-mutations.

| Name            | Sequence(5'-3')                                |
|-----------------|------------------------------------------------|
| <i>cyp142</i> F | GGCATATGACTGAAGCTCCGGACGT                      |
| <i>cyp142</i> R | TCTCGAGGCCAGCGGGGCTC                           |
| pet30aF         | GGTGTCTGGGGCGCAGCCATGACCCAGTCACGTAGCG          |
| pet30aR         | TCATGGCTGCGCCCCGACACCCGCCAACACCCGCTG           |
| C110S F         | GCCGCGCTGTCTGACACCCTGATCGACGCCGTGTGC           |
| C110S R         | CAGGGTGT <b>CAG</b> ACAGCGGCAATCGACGCCTCCTT    |
| C118S F         | GACGCCGTGT <b>CAG</b> AACCGGCGGAGTGTGACTTCGTG  |
| C118S R         | GCCGCGTTCT <b>GAC</b> ACGGCGTCGATCAGGGTGTCAACA |
| C123S F         | CGCGGCGAGTCTGACTTCGTGCGGGACCTGGCCGC            |
| C123S R         | CACGAAGT <b>CAG</b> ACTCGCCGCGTTCGCACACGGCGT   |
| C281S F         | AAGAACATGTCTCGGGTGTGACCGGGATACCGAG             |



---

C281S R CAACACCCG**AG**ACATGTTCTTTACCGGGGCGGTCCA

C296S F ACGGCGTT**GCT**GCCGGCGAGAAGATGATGCTGCTC

C296S R CTCGCCGGC**AG**ACAACGCCGTGCCGTGAAACTCGGT

C316S F GCGGTTTT**CT**CAGAACCGGAAAAGTTTGATGTTCCAG

C316S R TTCCGGTT**CT**GAGAAAACCGCCTCGTCCAAGTTCGC

C340T F ACGCATTT**CA**CTCTGGGCAATCAGCTGGCCCGGTTG

C340T R ATTGCC**CA**GTGAAATGCGTGCCGAAGCCAAACGC

---

**Table S2.** Molecular weight of CYP142A1 and cysterine mutants measured by ESI-MS.

| Name     | Molecular weight |
|----------|------------------|
| CYP142A1 | 45461.87         |
| C110S    | 45441.45         |
| C118S    | 45441.68         |
| C123S    | 45446.04         |
| C281S    | 45442.46         |
| C296S    | 45440.73         |
| C316S    | 45443.07         |

---
